# Supplementary material
Source: Springer Nature journal article supplement (https://www.springermedizin.de/resource/supplementary/12891_2012_1829_MOESM5_ESM.pdf/9508534)

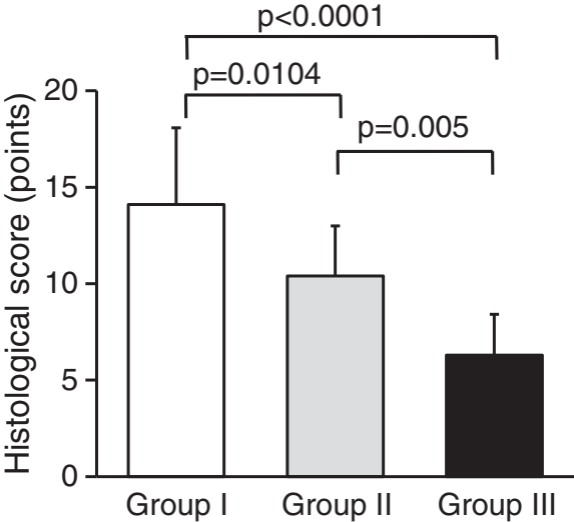

Supplement: MOESM5 [file 9508534]
